# Supplementary material
Source: publisher site journal article supplement (https://www.dovepress.com/get_supplementary_file.php?f=207910-Table-S1.docx)
Supplement: Supplementary file 1 [file get_supplementary_file.php]

| **Supplemental Table 1.** Institutional Review Boards and Ethics Committees That Provided Approval | |
| --- | --- |
| **Institutional Review Board/Ethics Committee** | **Location** |
| Copernicus Group IRB | Research Triangle Park, NC, USA |
| Western Institutional Review Board | Olympia, WA, USA |
| Quorum Review IRB | Seattle, WA, USA |
| Ministry of Healthcare of the Russian Federation, Council on Ethics | Moscow, Russia |
| Local Ethic Committee of Regional State Institution of Healthcare, Tomsk Clinical Psychiatric Hospital | Tomsk, Russia |
| Independent Ethics Committee pertaining to Limited Liability Company Arte Med Assistance | Saint Petersburg, Russia |
| Local Ethics Committee at Limited Liability Company Scientific Educational Center of Psychotherapy | Stavropol, Russia |
| Local Ethics Committee at State Healthcare Institution of Moscow Regional Central Clinical Psychiatric Hospital | Moscow, Russia |
| Local Ethics Committee at Federal State Budgetary Institution, Moscow Scientific Research Institute of Psychiatry of Ministry of Healthcare of the Russian Federation | Moscow, Russia |
| Inter-institutional Ethics Committee | Moscow, Russia |
| Independent Ethics Committee at Federal State Budgetary Institution of Healthcare, Saint-Petersburg Psychoneurological Research Institution n.a. V. M. Bekhterev of the Ministry of Health of the Russian Federation | Saint Petersburg, Russia |
| Local Ethic Committee at Federal State Budgetary Institution, Mental Health Research Center of the Russian Academy of Medical Sciences | Moscow, Russia |
| Independent Ethics Committee at Arte Med Assistance LLC | Saint Petersburg, Russia |
| Local Ethics Committee of State Healthcare Institution of Voronezh Regional, Voronezh Regional Clinical Psychoneurologic Dispensary | Voronezh, Russia |
| Ethics Committee at Saint-Petersburg State Budgetary Healthcare Institution Psychiatric Hospital #l n. a. P.P. Kaschenko | Nicolskoye, Russia |
| Ethics Committee of Regional state-owned institution Lipetsk Regional Psychoneurological Hospital | Plekhanovo, Russia |
| Local Ethics Committee of Saint Petersburg State Public Healthcare Institution City Psychiatric Hospital No. 4 | Saint Petersburg, Russia |
| Local Ethics Committee at State Budgetary Healthcare Institution of Yaroslavl Region, Yaroslavl Regional Clinical Psychiatry Hospital | Yaroslavl, Russia |
| Local Ethics Committee at Phoenix Treatment and Rehabilitation Research Center LLC | Rostov-on-Don, Russia |
| Ethics Committee of Public Medicoprophylactic Institution, Regional Clinical Psychiatric Hospital | Donetsk, Ukraine |
| Ethics Committee of Kyiv Regional Medical Incorporation, Psyhyatryya | Kyiv, Ukraine |
| Ethics Committee of State Institution Railway Clinical Hospital #1 of Railway Station of DTGO South-Western Railroad | Kyiv, Ukraine |
| Ethics Committee of Kiev City Psychoneurological Hospital #2 | Kiev, Ukraine |
| Ethics Committee of Lugansk Regional Clinical Psychoneurological Hospital | Lugansk, Ukraine |
| Ethics Committee of Public Healthcare Institution Kharkiv Regional Clinical Psychiatric Hospital #3 | Kharkiv, Ukraine |
| Ethics Committee of Public Mediocoprophylactic Institution Chernigiv Regional Psychoneurologic Hospital | Chernigiv, Ukraine |
| Ethics Committee of Public Institution Vinytsia Regional Psychoneurological Hospital named after Acad. O.I. Yuschenko | Vinnytsia, Ukraine |
| Ethics Committee of Poltava Regional Clinical Psychiatric Hospital n. a. O.F. Maltsev | Poltava, Ukraine |
| Ethics Committee of Crimean Republican Institution Clinical Psychiatric Hospital #1 | Simferopol, Ukraine |
| Ethics Committee of Public Institution Kherson Regional Psychiatric Hospital of Kherson Regional Council | Stepanovka, Ukraine |
| Ethics Committee of Zakarpatskyy Regional Narcological Dispensary | Uzhgorod, Ukraine |
| Ethics Committee of Communal Institution Lviv Regional Clinical Psychiatric Hospital | Lviv, Ukraine |
| Ethics Committee of Ternopil Regional Municipal Clinical Psychoneurological Hospital | Ternopil, Ukraine |
| Medical Research & Ethics Committee, Ministry of Health Malaysia c/o NIH Secretariat c/o Institute for Health Management Jalan Rumah Sakit | Kuala Lampur, Malaysia |
| Medical Ethics Committee, University Malaya Medical Centre | Kuala Lampur, Malaysia |
| UKM Medical Research Ethics Committee, Medical Research & Industry Secretariat | Kuala Lampur, Malaysia |
| Institutional Ethics Review Committee, Cebu Doctors’ University – Cebu Doctors’ University Hospital | Cebu, Philippines |
| Institutional Review Board, National Center for Mental Health | Mandaluyong City, Philippines |
| UP Manila Research Ethics Board (UPMREB), University of the Philippines Manila | Manila, Philippines |
| Institutional Review Board, The Medical City | Pasig City, Philippines |
| Institutional Review Board, National Center for Mental Health | Mandaluyong City, Philippines |
| Ethics Review Board, Western Visayas Medical Center | Iloilo City, Philippines |
| Ethics Review Committee, Iloilo Doctor’s Hospital, Inc. | Iloilo City, Philippines |
| Ethics Committee of Multicenter Trials | Sofia, Bulgaria |
| Comisia Nationala de Etica Pentru Studiul Clinic al Medicamentului | Bucuresti, Romania |
| Yeouido St. Mary’s Hospital IRB | Seoul, Republic of Korea |
| Jeju National University Hospital IRB | Jeju-si, Republic of Korea |
| Eulji General Hospital IRB | Seoul, Republic of Korea |
| Naju National Hospital IRB | Jeollanam-do, Republic of Korea |
|  |  |
